# Supplementary material
Source: publisher site journal article supplement (https://www.dovepress.com/article/398284)
Supplement: Supplementary file 1 [file get_supplementary_file.php]

**Figure S1:** Pan-cancer expression of TREM1 in tumor and normal tissues.

**Figure S2:** Cox regression analysis of TREM1 in TCGA pan-cancer.

**Figure S3:** Function enrichment analysis.

**Figure S4:** GSEA annotated with hallmark gene sets in pan-cancer.

**Figure S5:** Correlation analysis between TREM1 expression and the infiltration levels of immune cells.

**Figure S6:** Correlation analysis between TREM1 expression and immunomodulatory genes.

**Table S1:** Abbreviations of cancers in TCGA.

**Table S2:** Oligo sequences used in quantitative real-time PCR.

**Table S3:** Detailed information of TME-related signatures.

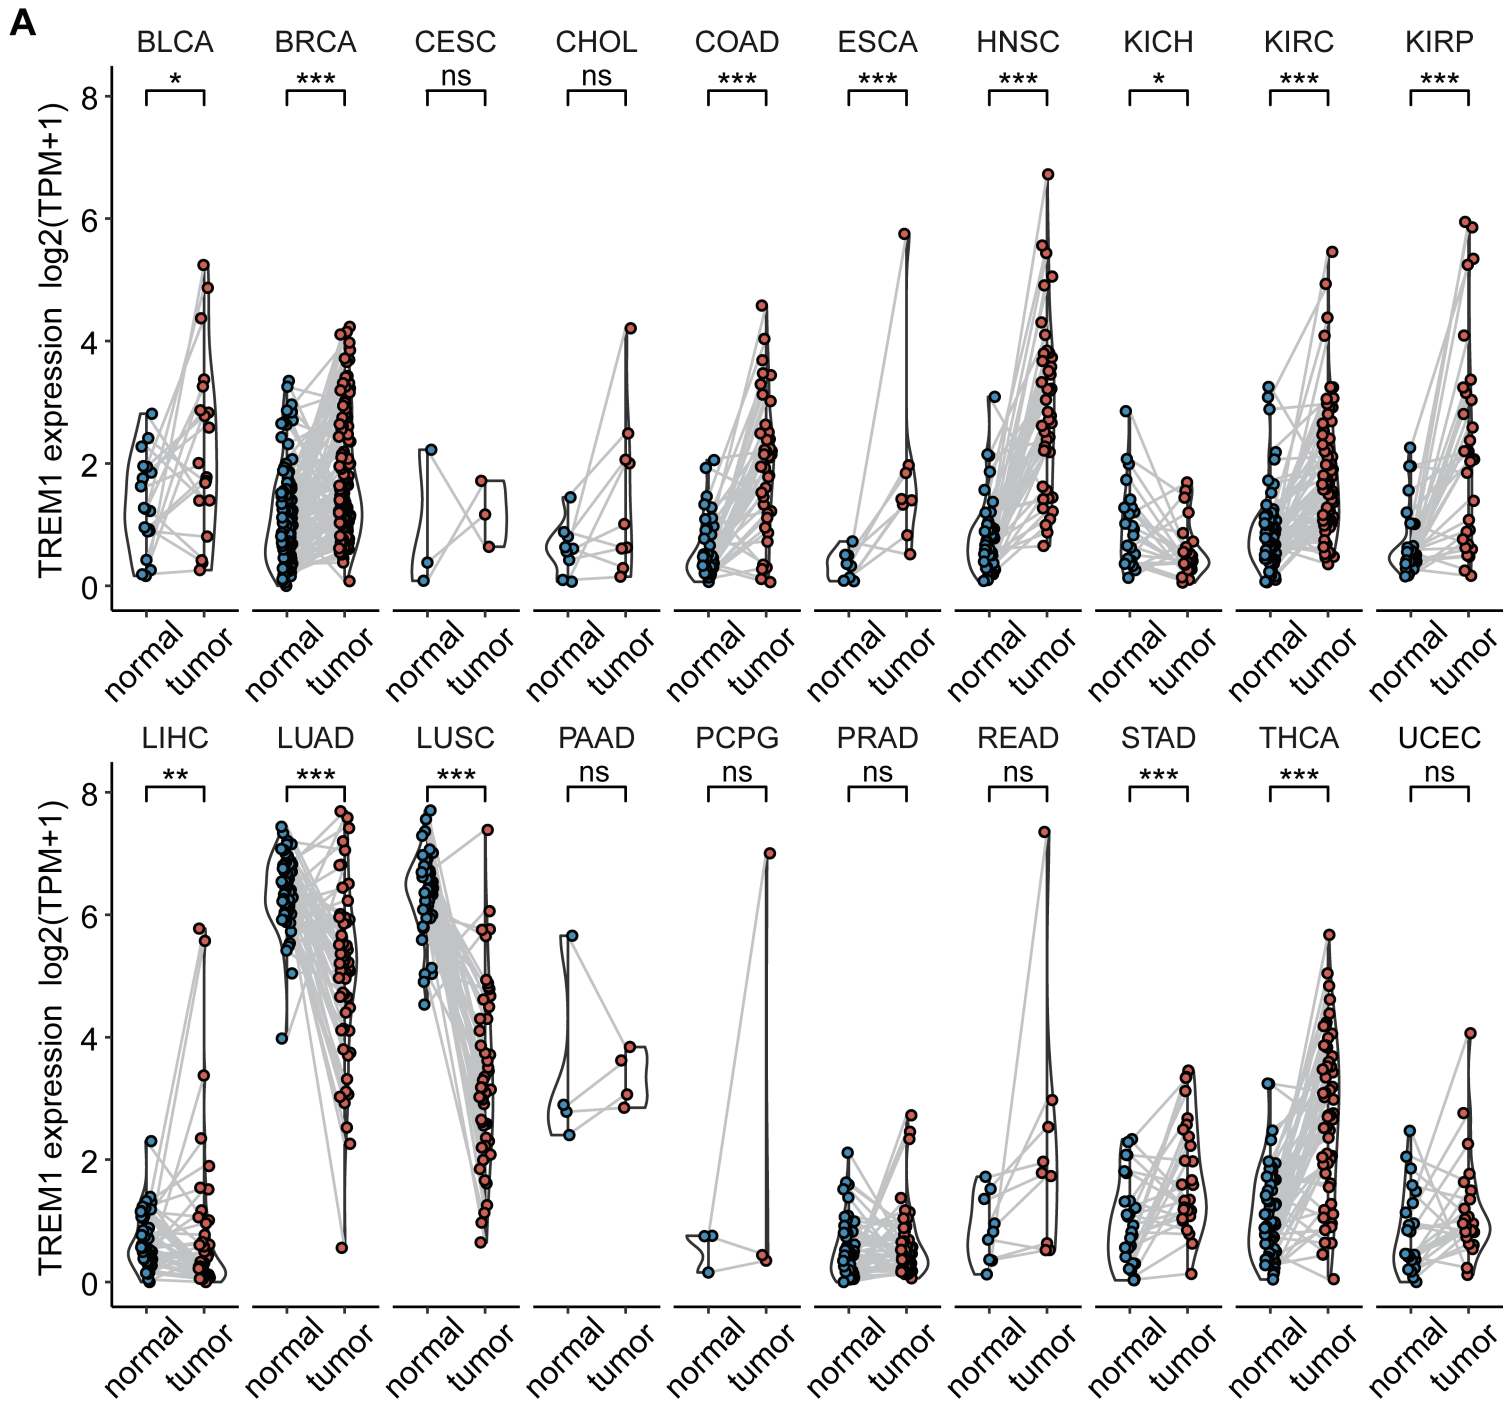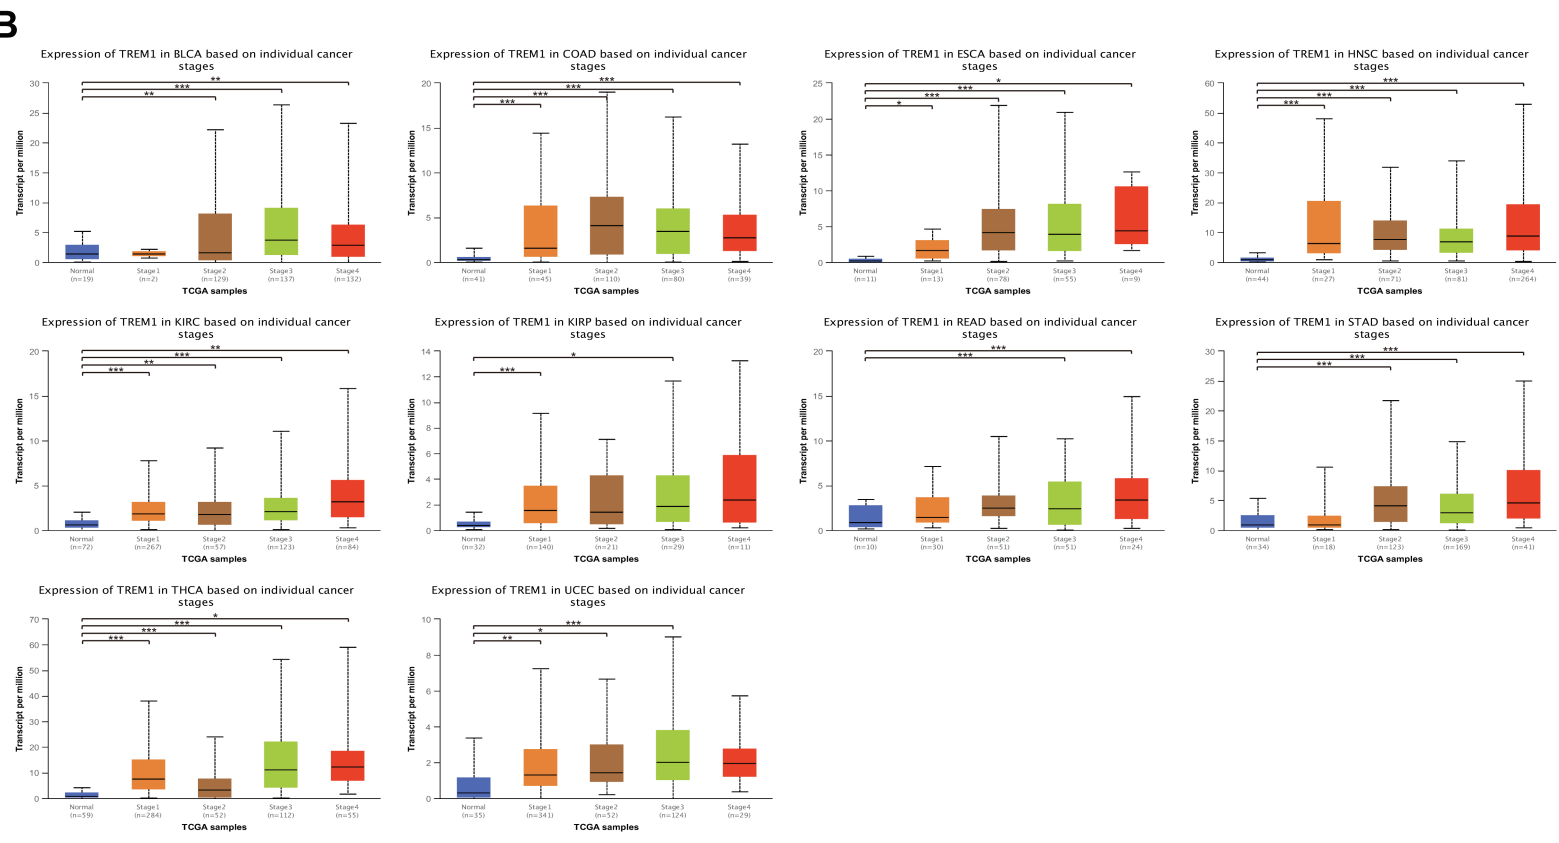

**Figure S1.** Pan-cancer expression of TREM1 in tumor and normal tissues. **(A)** Expression level of TREM1 in tumor and paired normal tissues in TCGA pan-cancer. **(B)** TREM1 expression in various AJCC stages in indicated tumor types. \*P < 0.05, \*\*P < 0.01, \*\*\*P < 0.001. AJCC, American Joint Committee on Cancer; TCGA, The Cancer Genome Atlas. Abbreviation list of tumor cohorts from TCGA is given in **Table S1**.

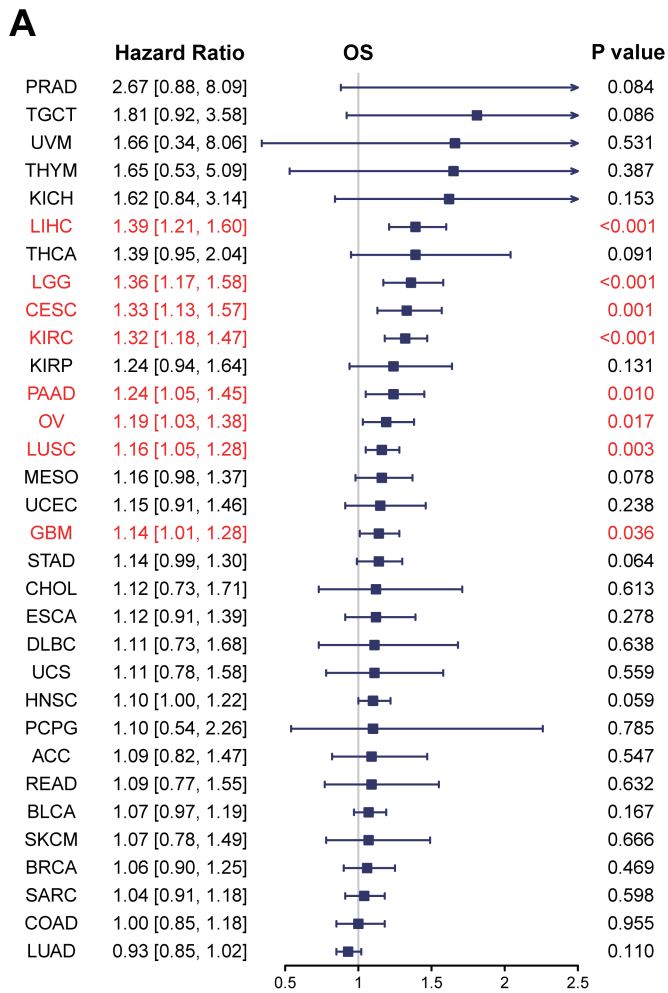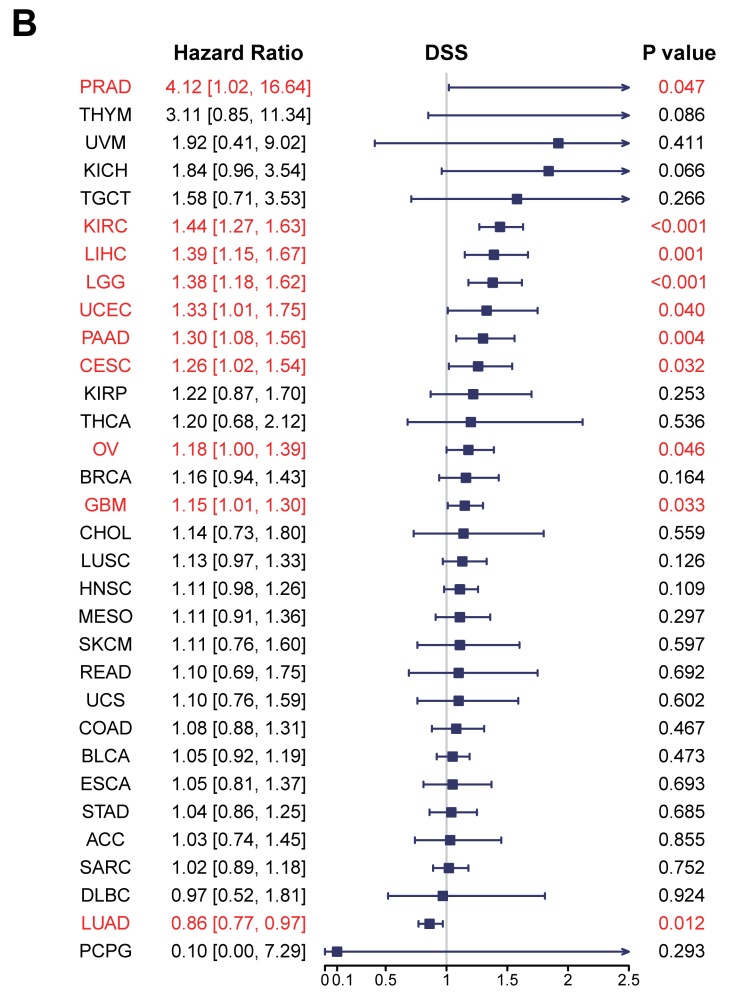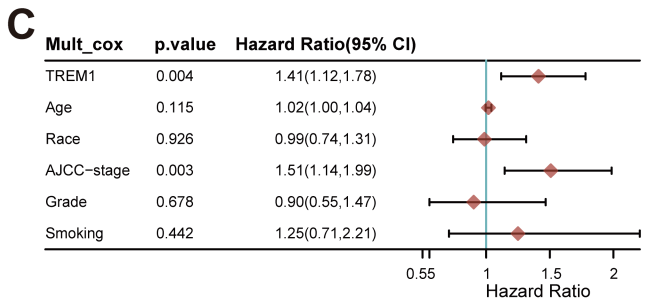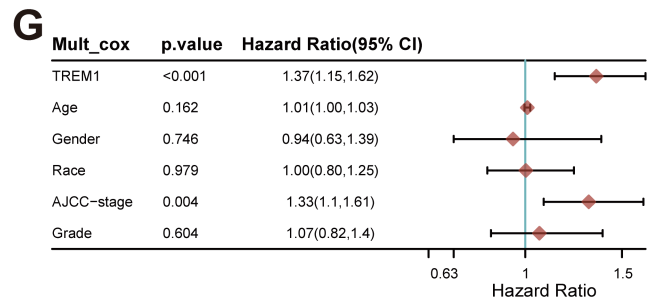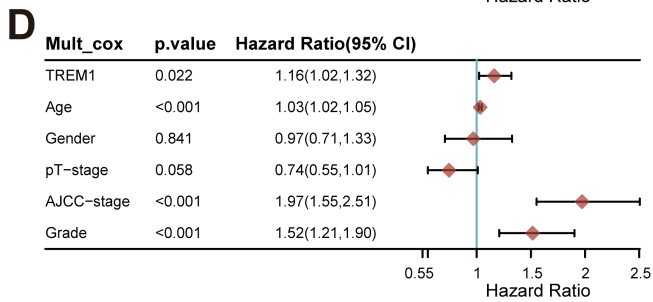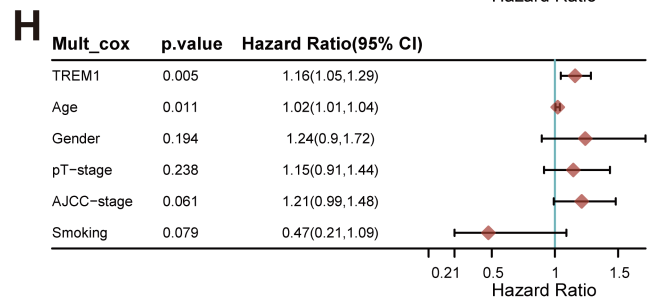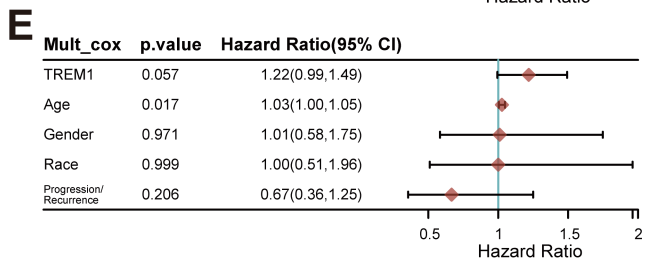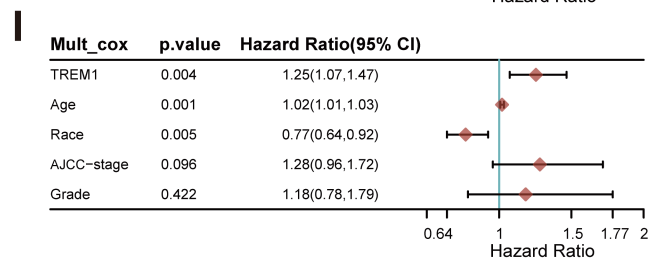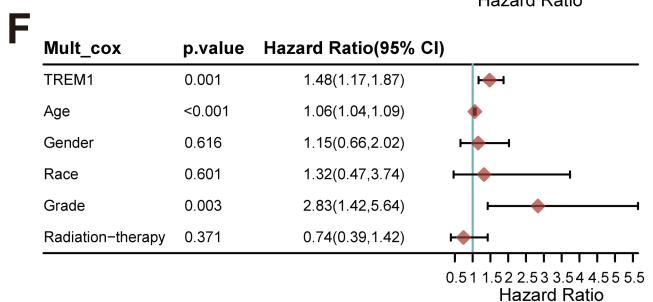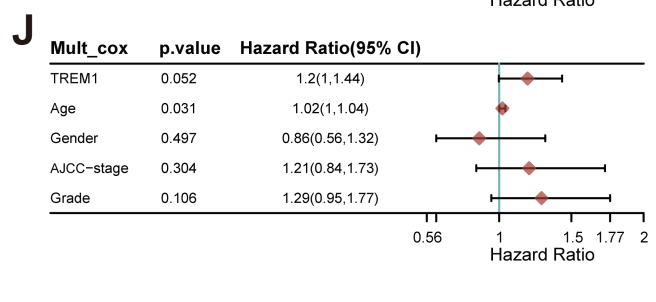



**Figure S2.** Cox regression analysis of TREM1 in TCGA pan-cancer. **(A, B)** Forest plots showing the relation between TREM1 expression and OS **(A)** or DSS **(B)** of different tumors. Red represents the significant results ( $P < 0.05$ ). **(C-J)** Forrest plots displaying the result of multivariable Cox regression analysis for OS in CESC **(C)**, KIRC **(D)**, GBM **(E)**, LGG **(F)**, LIHC **(G)**, LUSC **(H)**, OV **(I)** and PAAD **(J)**. DSS, disease-specific survival; OS, overall survival; TCGA, The Cancer Genome Atlas. Abbreviation list of tumor cohorts from TCGA is given in **Table S1**.

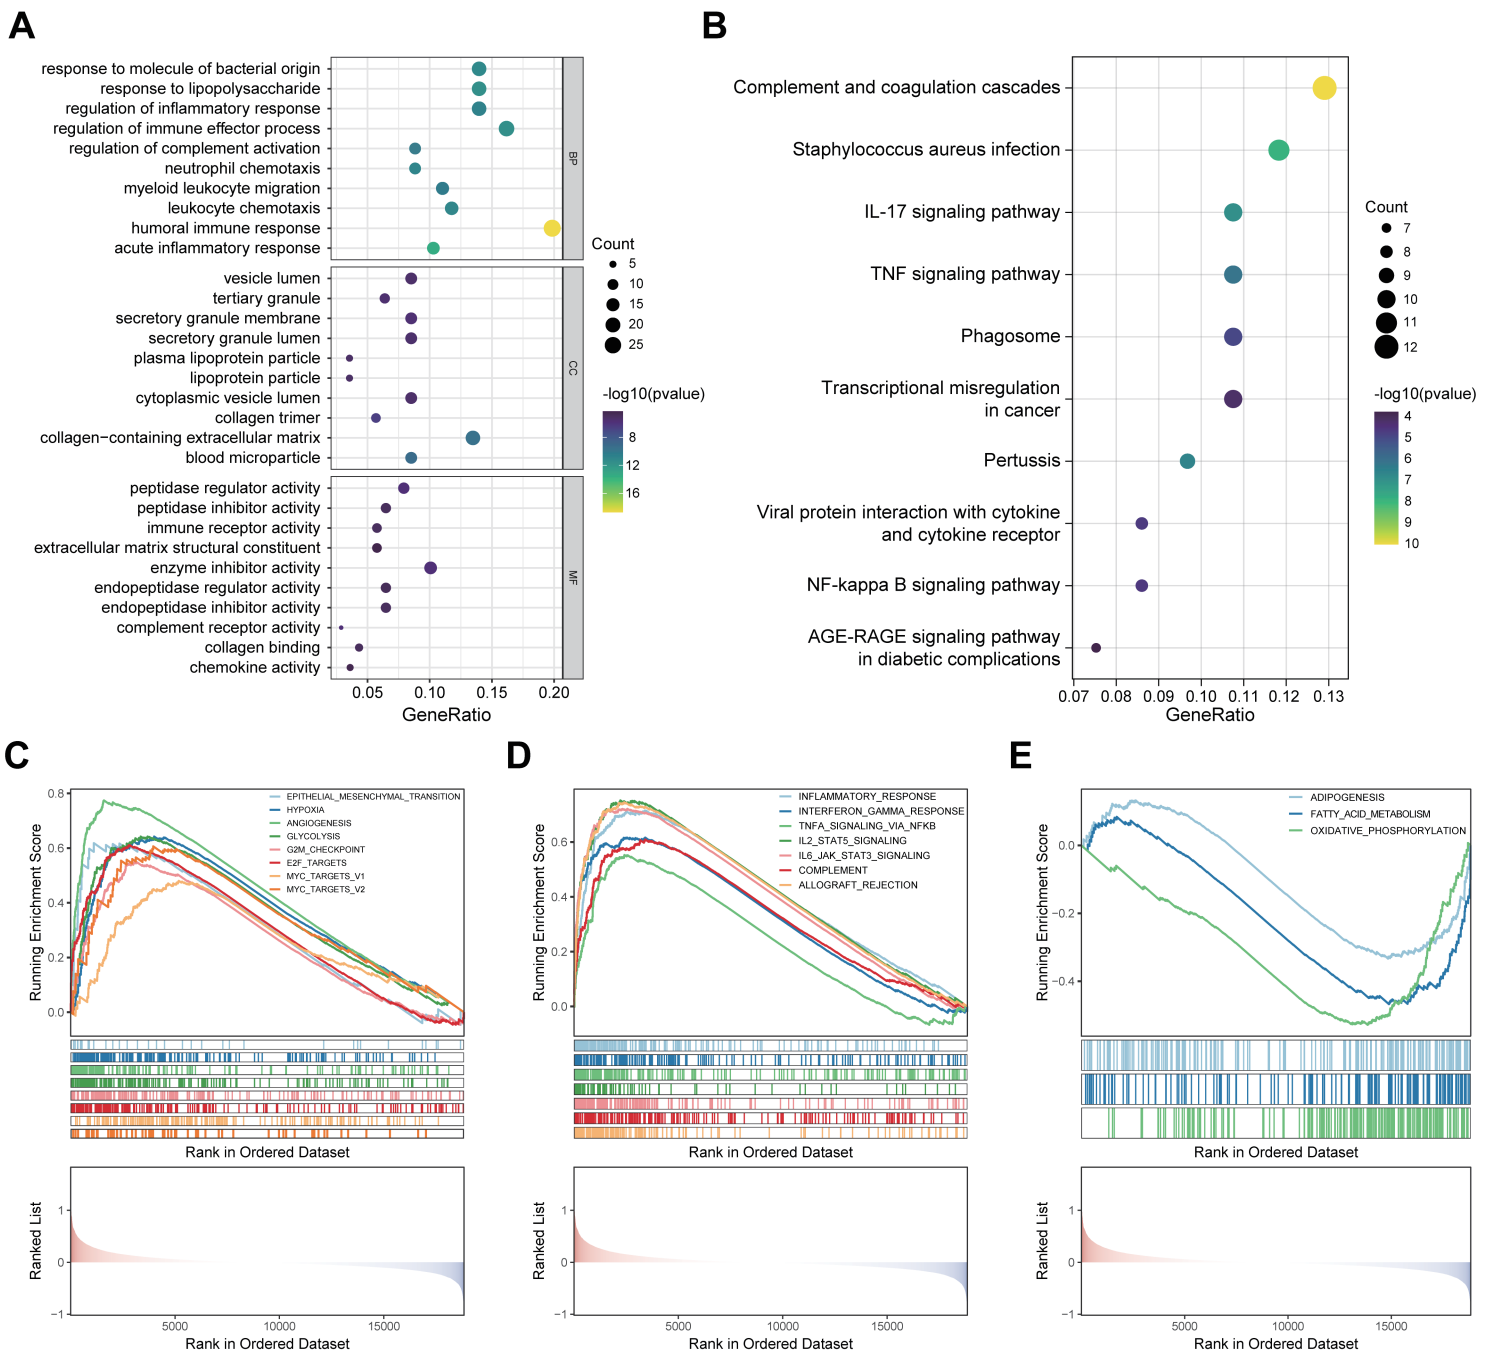

**Figure S3.** Function enrichment analysis. **(A, B)** Functional annotation of the DEGs between high- and low-TREM1 groups with GO **(A)** and KEGG **(B)** terms in KIRC **(C-E)** GSEA plot for significantly enriched Hallmark gene sets associated with TRME1 in KRIC. DEGs, differentially expressed genes; GO, Gene Ontology; GSEA, Gene Set Enrichment Analysis; KEGG, Kyoto Encyclopedia of Genes and Genomes; KIRC, Kidney renal clear cell carcinoma.



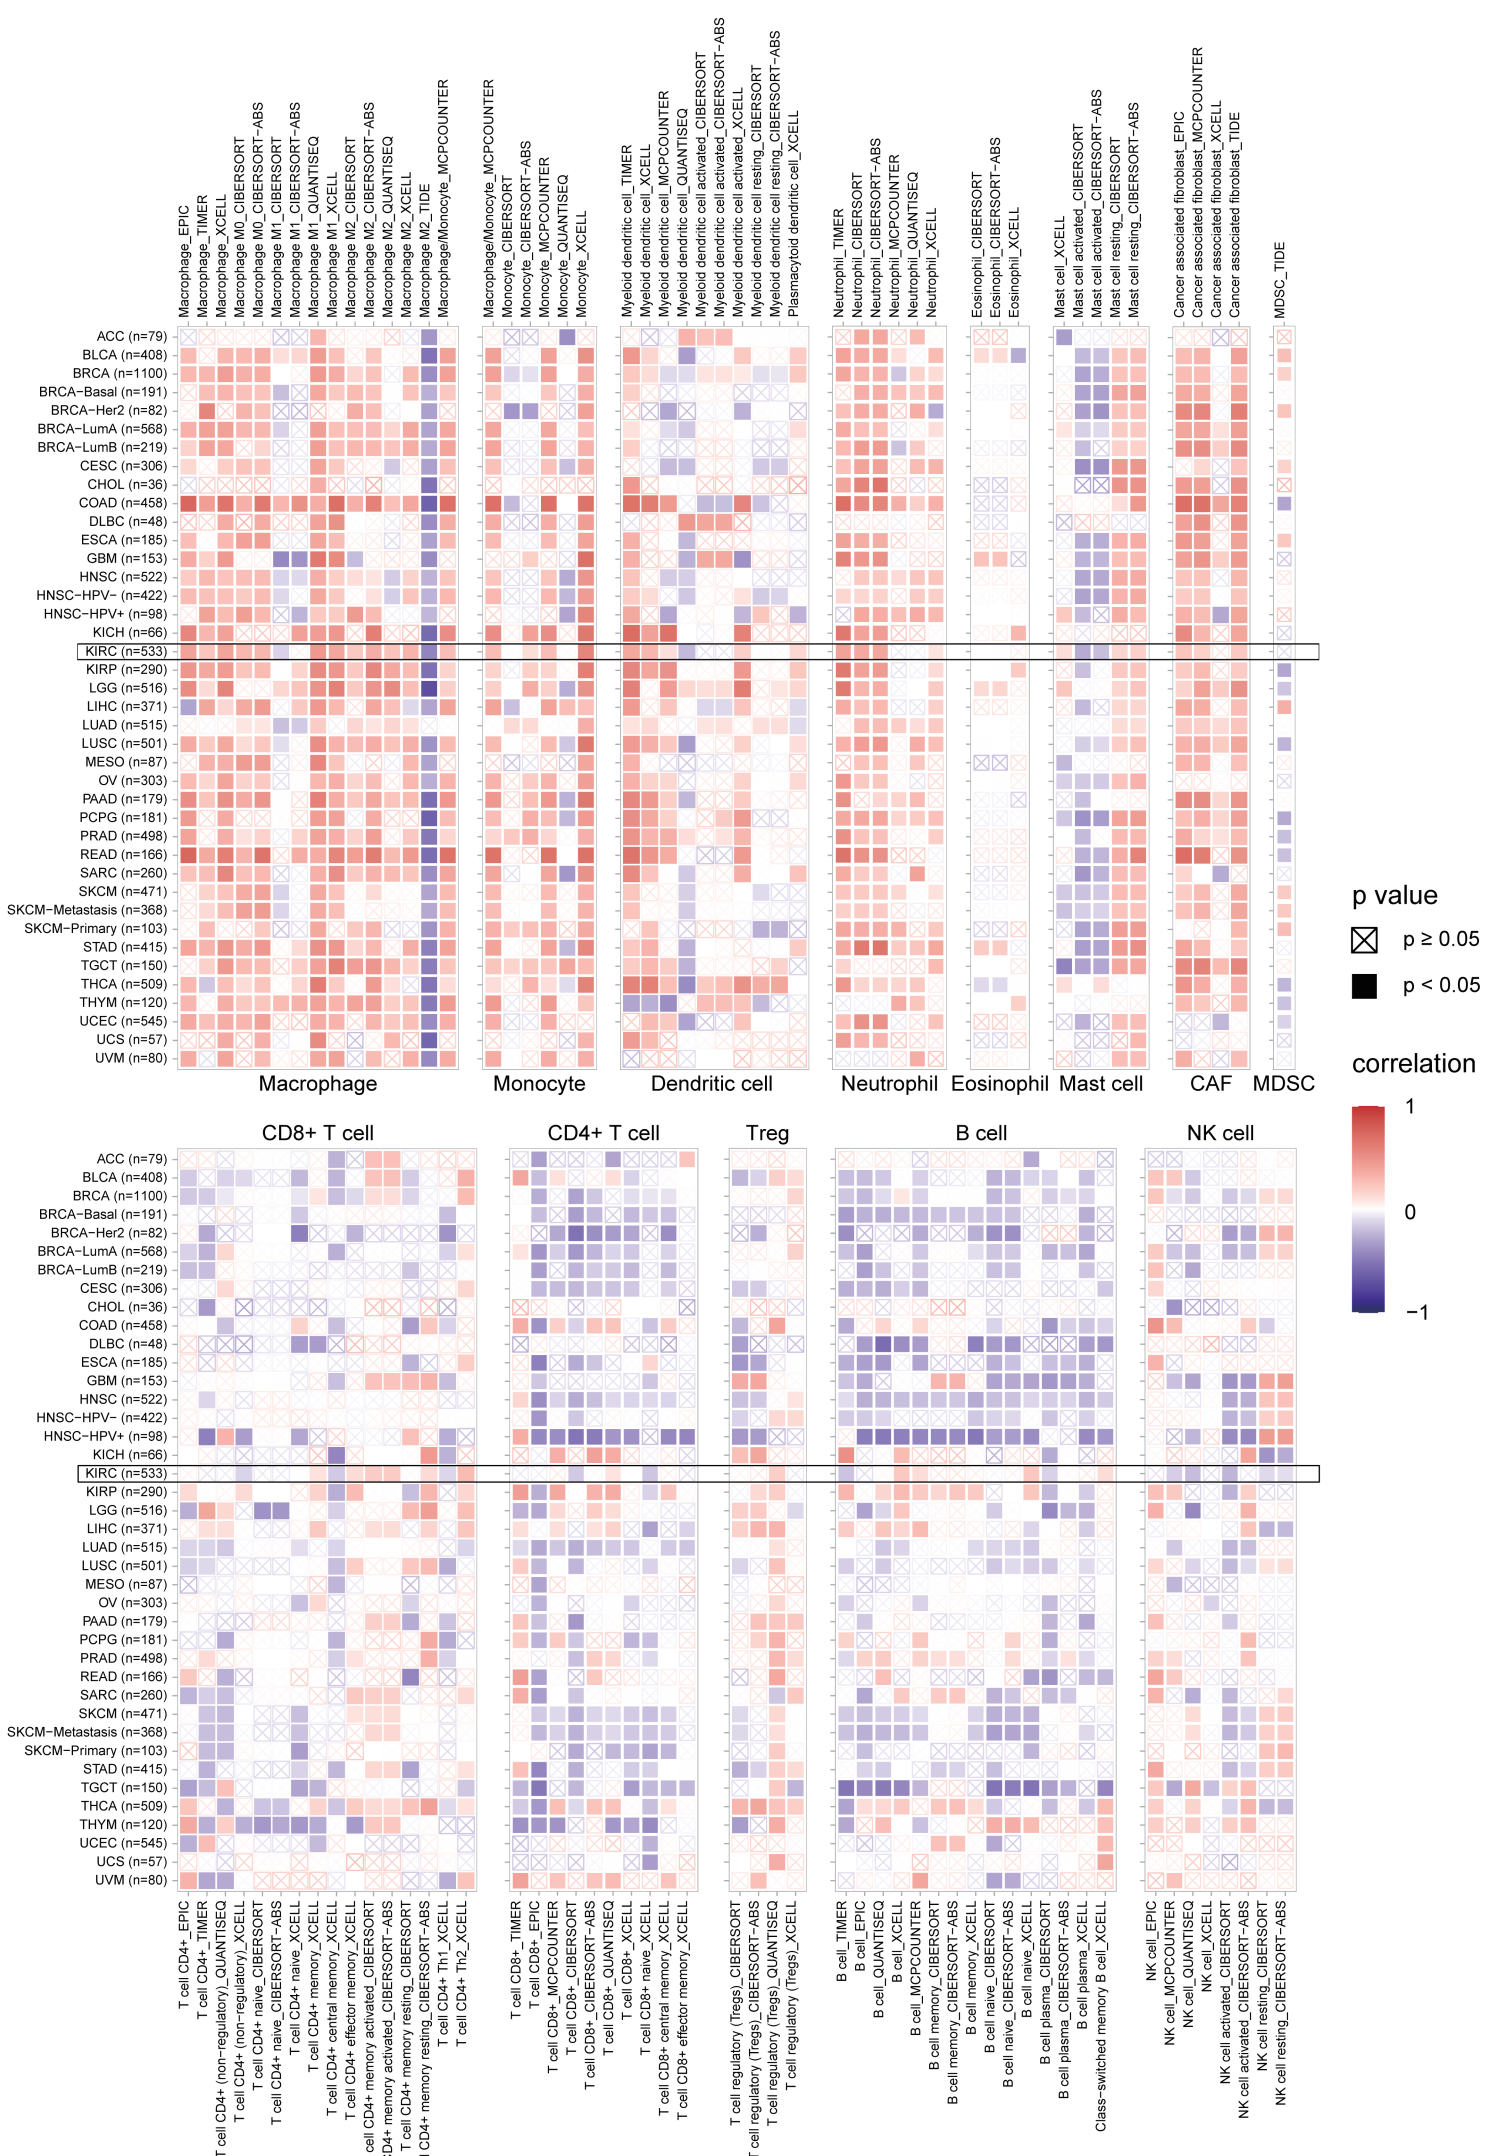

**Figure S6.** Correlation analysis between TREM1 expression and the infiltration levels of macrophages, monocytes, dendritic cells (DCs), myeloid-derived suppressor cells (MDSCs), neutrophils, eosinophils, CD4+ T cells, CD8+ T cells, T-regulatory lymphocytes (Tregs), NK cells, B cells, mast cells, and cancer-associated fibroblasts (CAFs) in pan-cancer based on TIMER2.0 database. Abbreviation list of tumor cohorts from TCGA is given in Table S1.

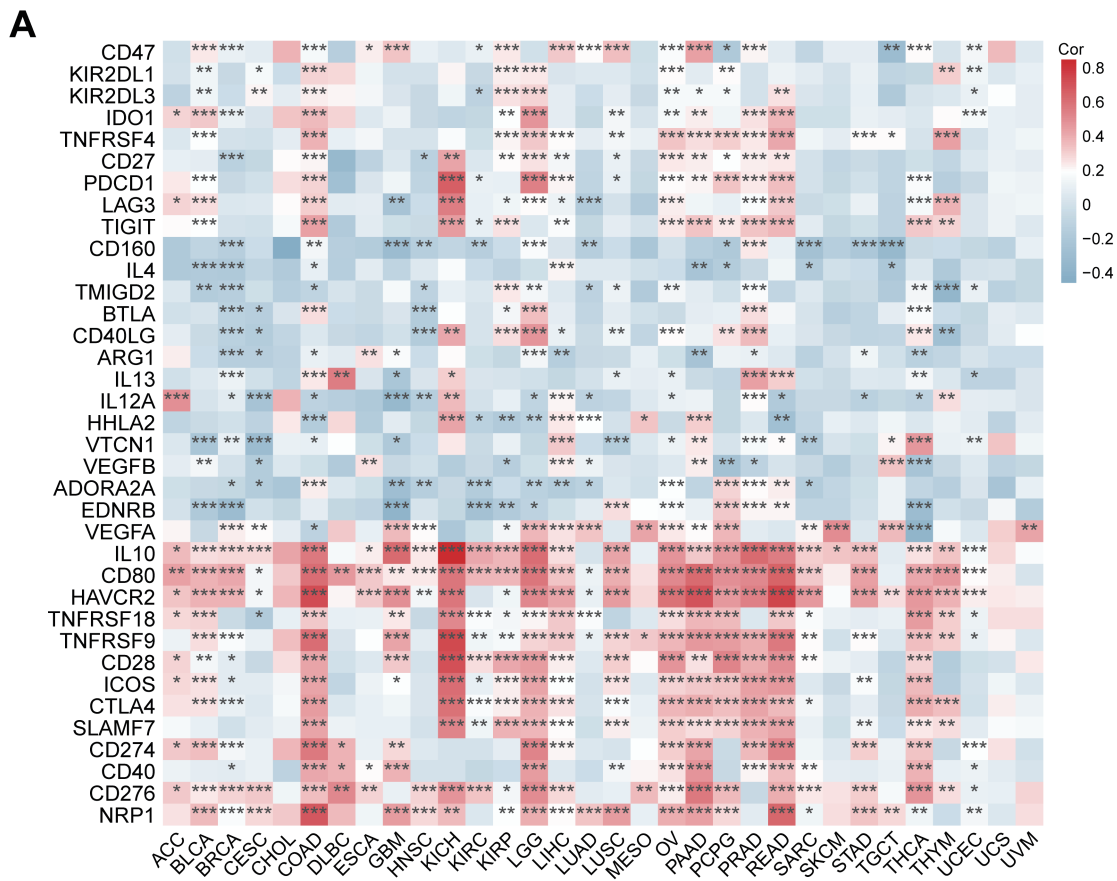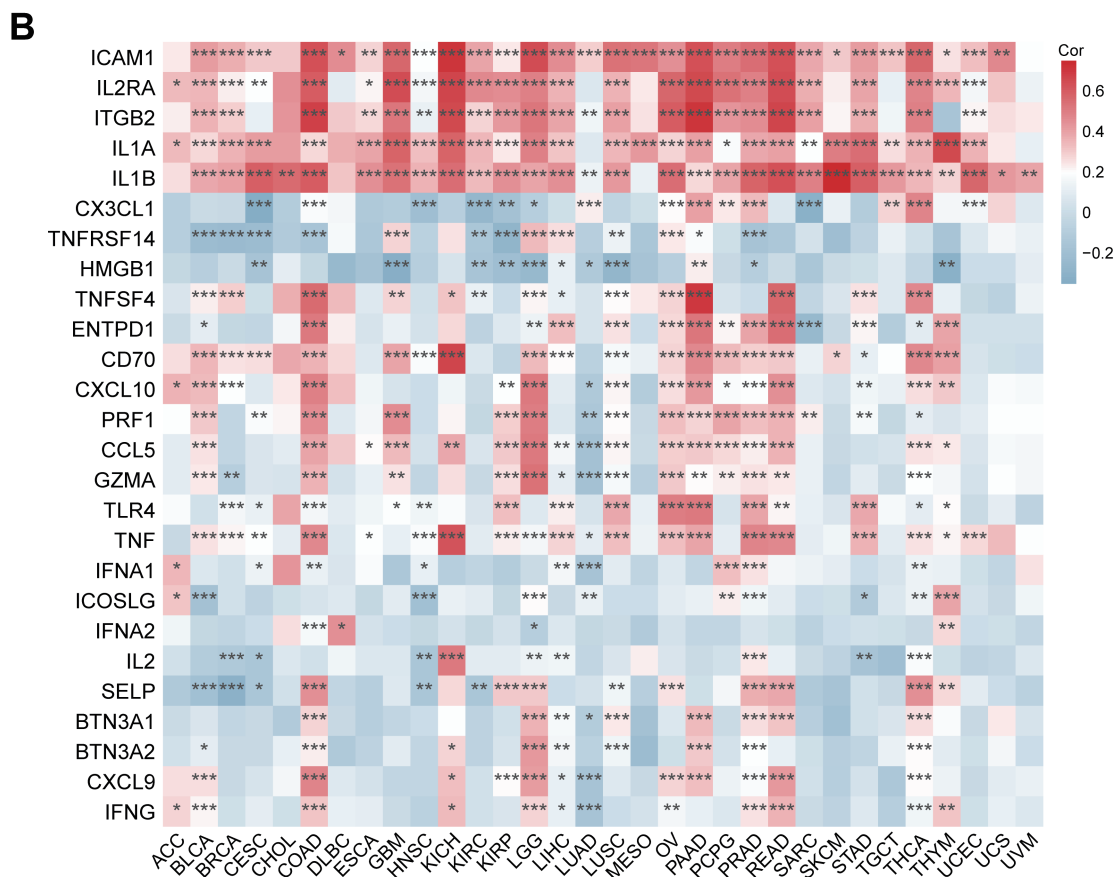

**Figure S6.** Correlation analysis between TREM1 expression and immunomodulatory genes. **(A, B)** Heatmap displaying the association between TREM1 expression and inhibitory genes **(A)** or immune stimulatory **(B)** in pan-cancer. Abbreviation list of tumor cohorts from TCGA is given in Table S1. \* $P < 0.05$ , \*\* $P < 0.01$ , \*\*\* $P < 0.001$ .

**Supplementary Table1: Abbreviations of cancers in TCGA**

| <b>Abbreviation</b> | <b>Detail</b>                                                    |
|---------------------|------------------------------------------------------------------|
| ACC                 | Adrenocortical carcinoma                                         |
| BLCA                | Bladder Urothelial Carcinoma                                     |
| BRCA                | Breast invasive carcinoma                                        |
| CESC                | Cervical squamous cell carcinoma and endocervical adenocarcinoma |
| CHOL                | Cholangio carcinoma                                              |
| COAD                | Colon adenocarcinoma                                             |
| COADREAD            | Colon adenocarcinoma/Rectum adenocarcinoma Esophageal carcinoma  |
| DLBC                | Lymphoid Neoplasm Diffuse Large B-cell Lymphoma                  |
| ESCA                | Esophageal carcinoma                                             |
| GBM                 | Glioblastoma multiforme                                          |
| GBMLGG              | Glioma                                                           |
| HNSC                | Head and Neck squamous cell carcinoma                            |
| KICH                | Kidney Chromophobe                                               |
| KIPAN               | Pan-kidney cohort (KICH+KIRC+KIRP)                               |
| KIRC                | Kidney renal clear cell carcinoma                                |
| KIRP                | Kidney renal papillary cell carcinoma                            |
| LAML                | Acute Myeloid Leukemia                                           |
| LGG                 | Brain Lower Grade Glioma                                         |
| LIHC                | Liver hepatocellular carcinoma                                   |
| LUAD                | Lung adenocarcinoma                                              |
| LUSC                | Lung squamous cell carcinoma                                     |
| MESO                | Mesothelioma                                                     |
| OV                  | Ovarian serous cystadenocarcinoma                                |
| PAAD                | Pancreatic adenocarcinoma                                        |
| PCPG                | Pheochromocytoma and Paraganglioma                               |
| PRAD                | Prostate adenocarcinoma                                          |
| READ                | Rectum adenocarcinoma                                            |
| SARC                | Sarcoma                                                          |
| SKCM                | Skin Cutaneous Melanoma                                          |
| STAD                | Stomach adenocarcinoma                                           |
| STES                | Stomach and Esophageal carcinoma                                 |
| TGCT                | Testicular Germ Cell Tumors                                      |
| THCA                | Thyroid carcinoma                                                |
| THYM                | Thymoma                                                          |
| UCEC                | Uterine Corpus Endometrial Carcinoma                             |
| UCS                 | Uterine Carcinosarcoma                                           |
| UVM                 | Uveal Melanoma                                                   |

**Supplementary Table2: Oligo sequences used in quantitative real-time PCR**

| <b>Taget</b> | <b>Primer</b> |                         |
|--------------|---------------|-------------------------|
| ACTB         | Forward       | CATGTACGTTGCTATCCAGGC   |
|              | Reverse       | CTCCTTAATGTCACGCACGAT   |
| TREM1        | Forward       | GAACTCCGAGCTGCAACTAAA   |
|              | Reverse       | TCTAGCGTGTAGTCACATTTCAC |



**Supplementary Table3: Detailed information of TME-related signatures**

| <b>Pathway</b>                      | <b>Description</b>          | <b>Genes</b>                                                                                                         |
|-------------------------------------|-----------------------------|----------------------------------------------------------------------------------------------------------------------|
| MHCI                                | anti-tumor microenvironment | HLA-A, HLA-B, HLA-C, B2M, TAP1, TAP2, TAPBP                                                                          |
| MHCII                               | anti-tumor microenvironment | HLA-DRA, HLA-DRB1, HLA-DMA, HLA-DPA1, HLA-DPB1, HLA-DMB, HLA-DQB1, HLA-DQA1, CIITA                                   |
| Co-activation molecules             | anti-tumor microenvironment | CD28, CD40, TNFRSF4, ICOS, TNFRSF9, CD27, CD80, CD86, CD40LG, CD83, TNFSF4, ICOSLG, TNFSF9, CD70                     |
| Effector cells                      | anti-tumor microenvironment | IFNG, GZMA, GZMB, PRF1, GZMK, ZAP70, GNLY, FASLG, TBX21, EOMES, CD8A, CD8B                                           |
| Effector cell traffic               | anti-tumor microenvironment | CXCL9, CXCL10, CXCL11, CX3CL1, CCL3, CCL4, CX3CR1, CCL5, CXCR3                                                       |
| NK cells                            | anti-tumor microenvironment | NKG7, CD160, CD244, NCR1, KLRC2, KLRK1, CD226, GZMH, GNLY, IFNG, KIR2DL4, EOMES, GZMB, FGFBP2, KIR3DL1, SH2D1B, NCR3 |
| T cells                             | anti-tumor microenvironment | TBX21, ITK, CD3D, CD3E, CD3G, TRAC, TRBC1, TRBC2, CD28, CD5, TRAT1                                                   |
| B cells                             | anti-tumor microenvironment | CD19, MS4A1, TNFRSF13C, CR2, TNFRSF17, TNFRSF13B, CD22, CD79A, CD79B, BLK, FCRL5, PAX5, STAP1                        |
| M1 signature                        | anti-tumor microenvironment | NOS2, TNF, IL1B, SOCS3, CMKLR1, IRF5, IL12A, IL12B, IL23A                                                            |
| Th1 signature                       | anti-tumor microenvironment | IFNG, IL2, CD40LG, IL21, TBX21, STAT4, IL12RB2                                                                       |
| Antitumor cytokines                 | anti-tumor microenvironment | TNF, IFNB1, IFNA2, CCL3, TNFSF10, IL21                                                                               |
| Checkpoint molecules                | pro-tumor microenvironment  | PDCD1, CD274, CTLA4, LAG3, PDCD1LG2, BTLA, HAVCR2, TIGIT, VSIR, C10orf54                                             |
| Treg                                | pro-tumor microenvironment  | FOXP3, CTLA4, IL10, TNFRSF18, CCR8, IKZF4, IKZF2                                                                     |
| Treg and Th2 traffic                | pro-tumor microenvironment  | CCL17, CCL22, CCL1, CCL28, CCR4, CCR8, CCR10                                                                         |
| Neutrophil signature                | pro-tumor microenvironment  | MPO, ELANE, PRTN3, CTSG, CXCR1, CXCR2, FCGR3B, CD177, FFAR2, PGLYRP1                                                 |
| Granulocyte traffic                 | pro-tumor microenvironment  | CXCL8, CXCL1, CXCL2, CXCL5, CCL11, KITLG, CXCR1, CXCR2, CCR3                                                         |
| Immune Suppression by Myeloid Cells | pro-tumor microenvironment  | IDO1, ARG1, IL10, CYBB, PTGS2, IL411, IL6                                                                            |
| Myeloid cells traffic               | pro-tumor microenvironment  | CSF2, CSF3, CXCL12, CCL26, IL6, CXCL8, CXCL5, CSF1R, CSF2RA, CSF3R, CXCR4, IL6R, CXCR2, CCL15, CSF1                  |

| <b>Pathway</b>                | <b>Description</b>         | <b>Genes</b>                                                                                                                         |
|-------------------------------|----------------------------|--------------------------------------------------------------------------------------------------------------------------------------|
| Tumor-associated Macrophages  | pro-tumor microenvironment | IL10, MRC1, MSR1, CD163, CSF1R, IL4I1, SIGLEC1, CD68                                                                                 |
| Macrophage and DC traffic     | pro-tumor microenvironment | CCL2, CCL7, CCL8, XCL1, CCR2, XCR1, CSF1R, CSF1                                                                                      |
| Th2 signature                 | pro-tumor microenvironment | IL4, IL5, IL13, IL10, GATA3, CCR4                                                                                                    |
| Protumor cytokines            | pro-tumor microenvironment | IL10, TGFB1, TGFB2, TGFB3, IL22, MIF, IL6                                                                                            |
| Cancer-associated fibroblasts | angiogenesis fibrosis      | COL1A1, COL1A2, COL5A1, ACTA2, FGF2, FAP, LRP1, CD248, COL6A1, COL6A2, COL6A3, CXCL12, FBLN1, LUM, MFAP5, MMP3, MMP2, PDGFRB, PDGFRA |
| Matrix                        | angiogenesis fibrosis      | FN1, COL1A1, COL1A2, COL4A1, COL3A1, VTN, LGALS7, LGALS9, LAMA3, LAMB3, LAMC2, TNC, ELN, COL5A1, COL11A1                             |
| Matrix remodeling             | angiogenesis fibrosis      | CA9, MMP9, MMP2, MMP1, MMP3, MMP12, MMP7, MMP11, PLOD2, ADAMTS4, ADAMTS5, LOX                                                        |
| Angiogenesis                  | angiogenesis fibrosis      | VEGFA, VEGFB, VEGFC, PDGFC, CXCL8, CXCR2, FLT1, PGF, CXCL5, KDR, ANGPT1, ANGPT2, TEK, VWF, CDH5                                      |
| Endothelium                   | angiogenesis fibrosis      | NOS3, KDR, FLT1, VCAM1, VWF, CDH5, MMRN1, ENG, CLEC14A, MMRN2                                                                        |
| Tumor proliferation rate      | malignant cell properties  | MKI67, ESCO2, CETN3, CDK2, CCND1, CCNE1, AURKA, AURKB, E2F1, MYBL2, BUB1, PLK1, CCNB1, MCM2, MCM6                                    |
| EMT signature                 | malignant cell properties  | SNAI1, SNAI2, TWIST1, TWIST2, ZEB1, ZEB2, CDH2                                                                                       |
